# Supplementary material for: Nondegenerate two-photon absorption properties of a newly synthesized carbazole derivative
Source: Royal Society of Chemistry journal article supplement (doi:10.1039/c6tc04676b), 2016-12-07

# Nondegenerate two-photon absorption properties of a newly synthesized carbazole derivative

Shu Chen,<sup>†,a,1</sup> Yong-Chao Zheng,<sup>††,a,1</sup> Mei-Ling Zheng,<sup>\*a</sup> Xian-Zi Dong,<sup>a</sup> Feng Jin,<sup>a</sup> Zhen-Sheng Zhao,<sup>a</sup> and Xuan-Ming Duan<sup>\*b</sup>

<sup>a</sup> Laboratory of Organic NanoPhotonics and Laboratory of Bio-Inspired Smart Interface Science, Technical Institute of Physics and Chemistry, Chinese Academy of Sciences, No. 29 Zhongguancun East Road, Beijing 100190, P. R. China. \*E-mail: zhengmeiling@mail.ipc.ac.cn; Fax: +86-10-82543597; Tel: +86-10-82543596.

<sup>b</sup> Chongqing Institute of Green and Intelligent Technology, Chinese Academy of Sciences, No. 266 Fangzheng Ave, Shuitu technology development zone, Beibei District, Chongqing 400714, P. R. China. \*E-mail: xmduan@cigit.ac.cn.

<sup>†</sup> Present address: College of Physics and Engineering, Zhengzhou University, Zhengzhou, 450001, China.

<sup>††</sup> Present address: State Key Lab of NBC Protection for Civilian, P.O. BOX 1043, Beijing, 102205, China.

<sup>1</sup> These authors contributed equally to this work.

Electronic Supplementary Information (ESI) available: <sup>1</sup>H NMR spectrum of molecule. See DOI: 10.1039/b000000x/

<sup>1</sup>H NMR spectrum of the carbazole derivative (CDCl<sub>3</sub>, 400 MHz)

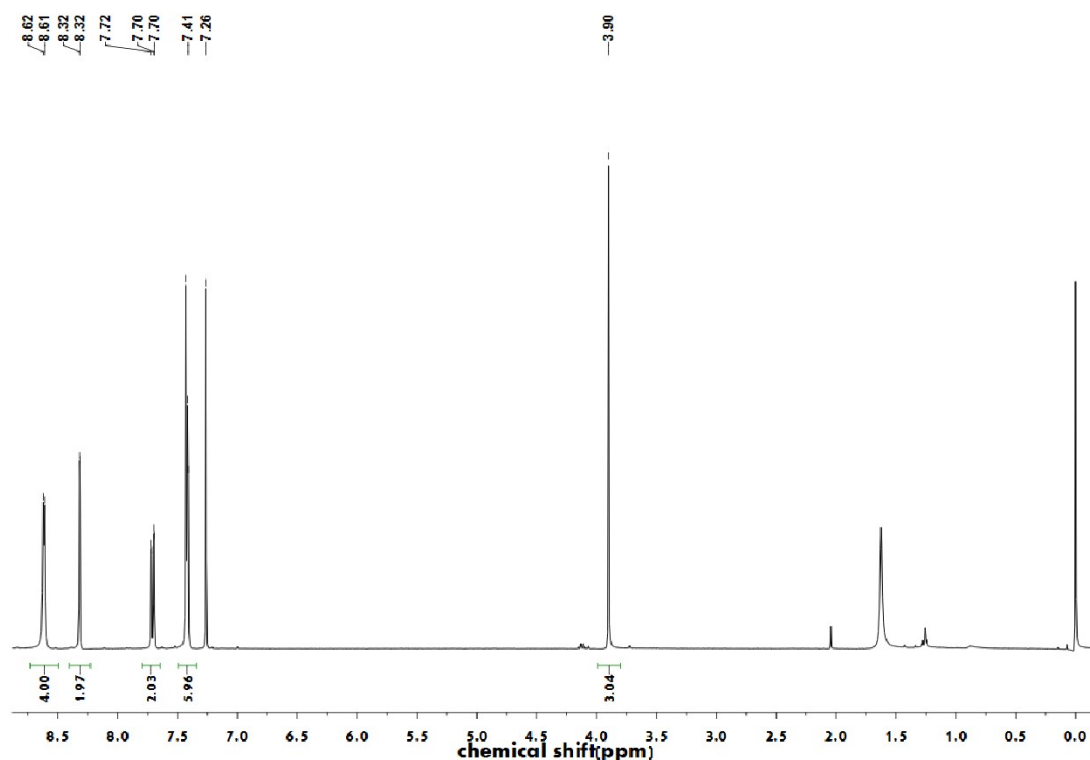

Supplement: c6tc04676b1.pdf [file c6tc04676b1.pdf]
